# Supplementary material
Source: Research Square preprint supplement (doi:10.21203/rs.3.rs-9045470/v1)
Supplement: Supplementary file 1 [file 46091ca62acdc98537213d4c.xlsx]

## Sheet: Sheet1
Gene	Primer direction	Primer sequence (5′–3′)
EP300	Forward	ACCAGGAATGACTTCTAGTTTGA
	Reverse	GTGCTGAAGAGGAGGGGTTT
FOXO3	Forward	ATGGGAGGATCAGTCACACA
	Reverse	AGCCACCTGAAATCACACCC
ZEB1	Forward	TGAATGGGCGACCAAGAACA
	Reverse	ACTGCCTGGTGATGCTGAAA
si-homo-ZEB1	Forward	GAACCUCUUGUCUCUCCUAAA
	Reverse	UAGGAGAGACAAGAGGUUCUU
GAPDH	Forward	GGACCTGACCTGCCGTCTAG
	Reverse	GTAGCCCAGGATGCCCTTGA
